# Supplementary material for: Effect of Place-Based Versus Default Mapping Procedures on Masked Speech Recognition: Simulations of Cochlear Implant Alone and Electric-Acoustic Stimulation
Source: PubMed Central journal article supplement (PMC9524846; doi:10.1044/2022_aja-21-00123), 2022-04-08
Supplement: AJA-31-322-s001.pdf [file AJA-31-322-s001.pdf]

**Supplemental Material S1.** Regression coefficients for the linear mixed model that compared performance between default and place-based maps that would be used clinically. This model included data from the following conditions: CI-default, EAS-default, CI-place, and EAS-place. The comparisons were to the CI-alone device, 5 dB SNR clinical level, and the default mapping procedure. *SE* = standard error.

|                                               | <b>Coefficient</b> | <b><i>SE</i></b> | <b><i>t</i></b> | <b><i>p</i></b> |
|-----------------------------------------------|--------------------|------------------|-----------------|-----------------|
| Device                                        | 0.68               | 0.20             | 3.45            | < .001          |
| Mapping procedure                             | 1.39               | 0.21             | 6.66            | < .001          |
| Level, 10 dB SNR                              | 1.24               | 0.10             | 12.71           | < .001          |
| Level, asymptote                              | 1.85               | 0.37             | 5.02            | < .001          |
| Device × Mapping procedure                    | −0.44              | 0.26             | −1.70           | .092            |
| Device × Level, 10 dB SNR                     | 0.10               | 0.12             | 0.85            | .399            |
| Device × Level, asymptote                     | 0.51               | 0.40             | 1.29            | .200            |
| Mapping procedure × Level, 10 dB SNR          | 0.15               | 0.13             | 1.21            | .230            |
| Mapping procedure × Level, asymptote          | 1.13               | 0.39             | 2.91            | .005            |
| Device × Mapping procedure × Level, 10 dB SNR | −0.17              | 0.16             | −1.04           | .303            |
| Device × Mapping procedure × Level, asymptote | 0.37               | 0.46             | 0.81            | .421            |
