# Supplementary material for: Effect of Place-Based Versus Default Mapping Procedures on Masked Speech Recognition: Simulations of Cochlear Implant Alone and Electric-Acoustic Stimulation
Source: PubMed Central journal article supplement (PMC9524846; doi:10.1044/2022_aja-21-00123), 2022-04-08
Supplement: AJA-31-322-s002.pdf [file AJA-31-322-s002.pdf]

**Supplemental Material S2.** Regression coefficients for the linear mixed model that assessed the benefit of adding acoustic low-frequency information to default maps with spectrally shifted information and place-based maps. Data from the following conditions were included: CI-default<sub>EAS</sub> (250–8500 Hz), EAS-default (250–8500 Hz), CI-place (550–8500 Hz), and EAS-place (550–8500 Hz). The comparisons were to the CI-alone device, 5 dB SNR clinical level, and the default mapping procedure. *SE* = standard error.

|                                                     | <b>Coefficient</b> | <b><i>SE</i></b> | <b><i>t</i></b> | <b><i>p</i></b> |
|-----------------------------------------------------|--------------------|------------------|-----------------|-----------------|
| Device                                              | 0.57               | 0.28             | 2.00            | .048            |
| Mapping procedure                                   | 1.63               | 0.29             | 5.65            | < .001          |
| Level,<br>10 dB SNR                                 | 1.45               | 0.22             | 6.71            | < .001          |
| Level, asymptote                                    | 2.43               | 0.22             | 11.26           | < .001          |
| Device ×<br>Mapping procedure                       | −0.33              | 0.43             | −0.76           | .450            |
| Device ×<br>Level, 10 dB SNR                        | −0.05              | 0.37             | −0.14           | .889            |
| Device ×<br>Level, asymptote                        | −0.06              | 0.37             | −0.16           | .871            |
| Mapping procedure ×<br>Level, 10 dB SNR             | −0.09              | 0.37             | −0.25           | .801            |
| Mapping procedure ×<br>Level, asymptote             | 0.99               | 0.37             | 2.66            | .009            |
| Device ×<br>Mapping procedure ×<br>Level, 10 dB SNR | −0.02              | 0.57             | −0.03           | .978            |
| Device ×<br>Mapping procedure ×<br>Level, asymptote | 0.36               | 0.57             | 0.63            | .530            |
